# Supplementary material
Source: publisher figshare collection journal article supplement (https://frontiersin.figshare.com/ndownloader/files/14520815)
Supplement: Supplementary file 1 [file 14520815]

**Supplementary Material S2:** UNEP-IOC categories of marine litter that were followed by the present study at the East Mingulay MPA (Cheshire and Adler, 2009).

| **General Class** | **Reference**  **Litter Code** | **LITTER TYPE and examples** |
| --- | --- | --- |
| CONTAINERS | RL01  RL02  RL03 | Bottle caps, lids, & pull tabs  Bottles < 2 L  Bottles, drums & buckets > 2 L |
| FISHING & BOATING | RL04  RL05  RL06  RL07  RL08 | Buoys  Fishing Net  Fishing Related (sinkers, lures, hooks, traps, pots & baskets/trays)  Monofilament line  Rope |
| FOOD & BEVERAGE | RL09  RL10  RL11  RL12 | Cups, food trays, fast food wrappers & cardboard drink containers  Drink cans  Drink package rings  Ice-cream sticks, chip forks, chopsticks, toothpicks, matches & fireworks |
| PACKAGING | RL13  RL14  RL15  RL16  RL17 | Foam (insulation & packaging)  Paper & cardboard  Plastic bags (opaque & clear)  Plastic sheet of plastic tarpaulin  Strapping |
| SANITARY | RL18 | Nappies, tampon applicators, cotton buds, condoms, etc. |
| SMOKING | RL19  RL20 | Cigarette butts  Cigarette lighters |
| OTHER | RL21  RL22  RL23  RL24  RL25  RL26  RL27  RL28  RL29 | Fluorescent light tubes  Light Globes  Other (specify)  Processed timber  Rags, clothing, shoes, hats & towels  Tableware  Toys  Tires & Inner-tubes  Wire, wire mesh & barbed wire |
